# Supplementary material for: Viral metagenomic analysis of fecal samples reveals an enteric virome signature in irritable bowel syndrome
Source: PubMed Central journal article supplement (PMC7236503; doi:10.1186/s12866-020-01817-4), 2020-05-19
Supplement: 12866_2020_1817_MOESM2_ESM.pdf [file 12866_2020_1817_MOESM2_ESM.pdf]

### Relative Abundance of Taxonomic Groups at Order Level

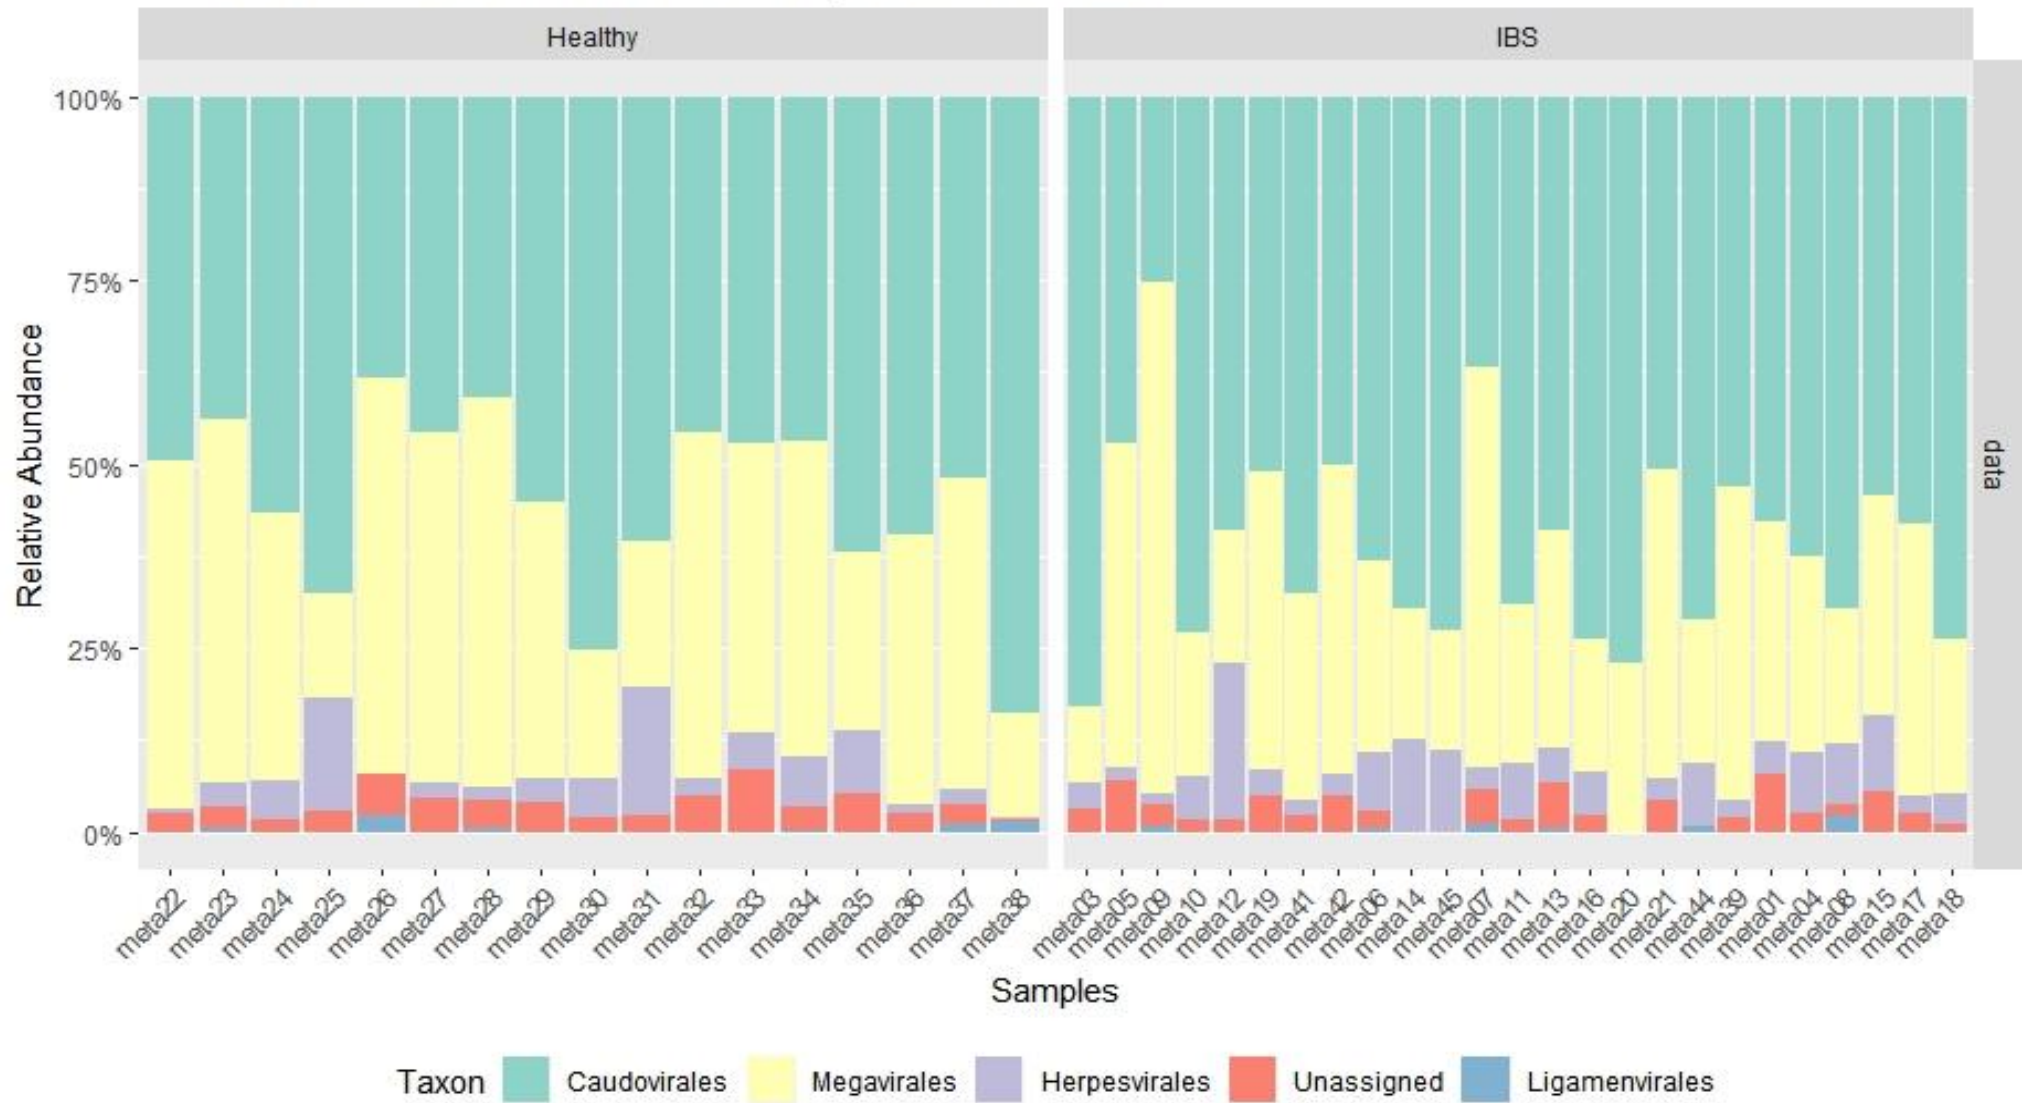

Additional file 2: **Fig. S1.** Relative abundance of sequences assigned to the viral orders in association with healthy control and IBS patients.

## Relative Abundance of Taxonomic Groups at Family Level

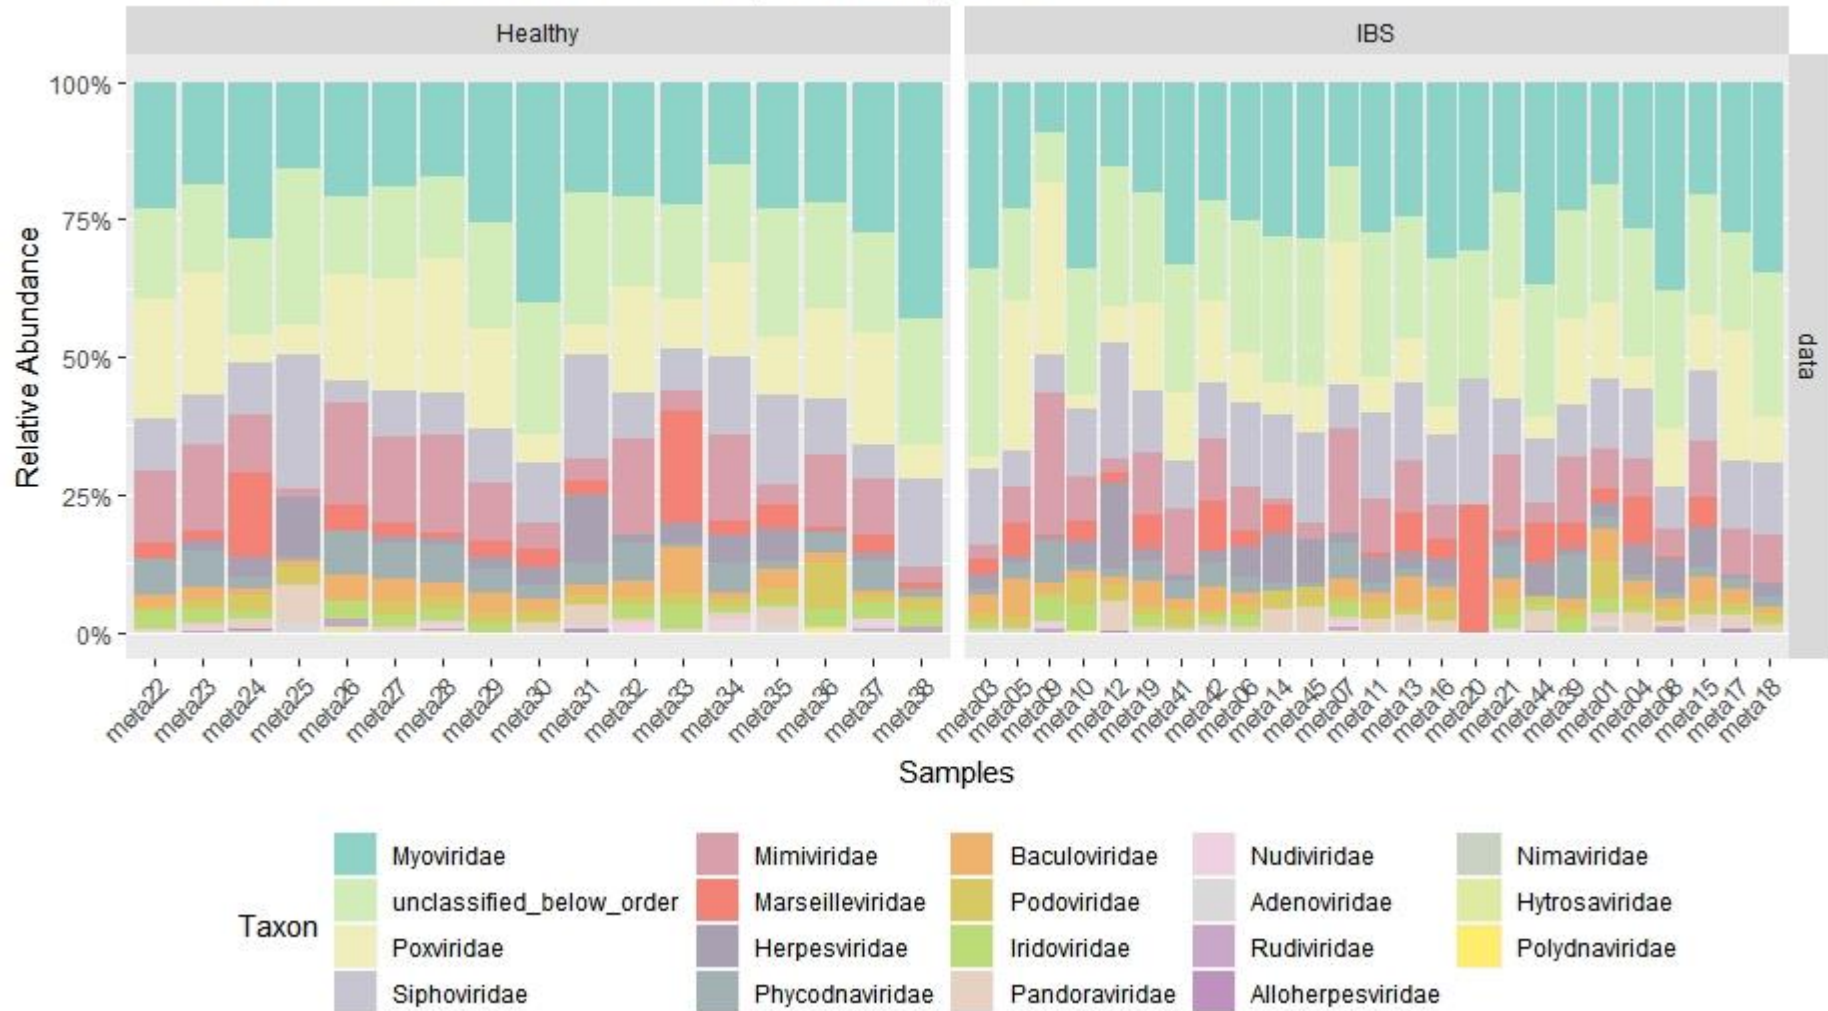

Additional file 2: **Fig. S2.** Relative abundance of sequences assigned to the viral family in association with healthy control and IBS patients.
